# Supplementary material for: Regulation of polarized morphogenesis by protein kinase C iota in oncogenic epithelial spheroids
Source: PubMed Central journal article supplement — Carcinogenesis. 2013 Sep 26;35(2):396–406. doi: 10.1093/carcin/bgt313 (PMC3908745; doi:10.1093/carcin/bgt313), 2013-09-26
Supplement: supp_bgt313_Linch_Carcinogenesis_Supporting_Information.pdf [file supp_bgt313_Linch_Carcinogenesis_Supporting_Information.pdf]

## Supporting Information

**Fig. S1.** MDCK cystogenesis in Matrigel. **(A)** MDCK cells embedded in Matrigel form cysts. Phase images were taken at multiple time points as indicated. **(B)** Day 6 MDCK cysts were fixed to coverslips and stained or immunostained for apical markers as indicated. The images are representative of at least 3 separate experiments. Scale bar represents 50 $\mu$ M.

**Fig. S2.** The effect of PKC $\iota$  knockdown on polarized morphogenesis of C-Raf and p110 $\alpha$  MDCK spheroids. MDCK oncogenic variant cell lines were treated with two separate siRNA-PKC $\iota$  (siPKC $\iota$ 1 & siPKC $\iota$ 2) and two scrambled controls (siSCRAM1 & siSCRAM2) for 24h prior to culture in Matrigel for 6 days. **(A)** Representative single confocal images with phalloidin (Red) stained actin and Hoechst (Blue) identified nuclei. Scale bar represent 50 $\mu$ m. **(B)** Quantification of number of Predominant Single Apical Lumens (PSALs). At least 100 spheroids were counted per condition and the mean and SEM of at least 3 separate experiments are presented. There were no statistical differences in PSALs upon PKC $\iota$  depletion for Raf-CAAX or p110-CAAX MDCK spheroids. **(C)** PKC $\iota$  protein depletion was confirmed in adherent cells 2 days after re-seed (72h after transfection) by Western Blot.

**Fig. S3.** Exogenous protein expression in MDCK cells. Western blot showing the level of exogenous protein in MDCK cells transfected with PKC $\iota$ /PKC $\iota$  mutants.
