# Supplementary figures and images for: Regulation of polarized morphogenesis by protein kinase C iota in oncogenic epithelial spheroids
Source: PubMed Central journal article supplement — Carcinogenesis. 2013 Sep 26;35(2):396–406. doi: 10.1093/carcin/bgt313 (PMC3908745; doi:10.1093/carcin/bgt313), 2013-09-26

Figure S3

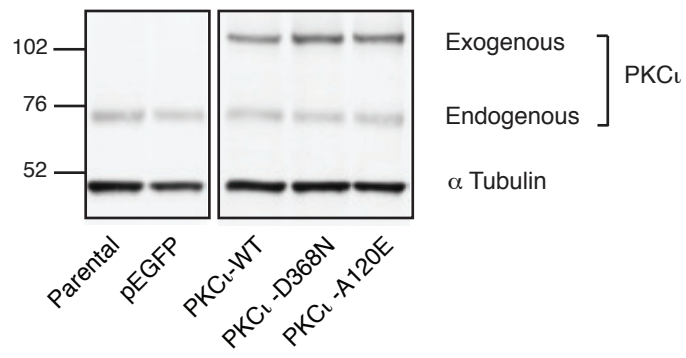

Supplement: supp_bgt313_Linch_Carcinogenesis_FigS3revisions.pdf [file supp_bgt313_Linch_Carcinogenesis_FigS3revisions.pdf]
